# Supplementary material
Source: PubMed Central journal article supplement (PMC3432319)
Supplement: NIHMS291512-supplement-2_si_002.pdf [file NIHMS291512-supplement-2_si_002.pdf]

Structure: TS-A

\*\*\*\*\*

Gaussian 09: IA32W-G09RevA.02 8-May-2009  
27-Jan-2011

\*\*\*\*\*

%mem=10000MB

%nprocshared=4

Will use up to 4 processors via shared memory.

%nosave

-----  
# opt=(calcfc,ts,noeigen) freq=noraman ub3lyp/genecp ginput  
-----

-----  
- Thermochemistry -  
-----

Zero-point correction= 0.778412 (Hartree/Particle)  
Thermal correction to Energy= 0.829888  
Thermal correction to Enthalpy= 0.830832  
Thermal correction to Gibbs Free Energy= 0.685917  
Sum of electronic and zero-point Energies= -3286.884913  
Sum of electronic and thermal Energies= -3286.833437  
Sum of electronic and thermal Enthalpies= -3286.832493  
Sum of electronic and thermal Free Energies= -3286.977408

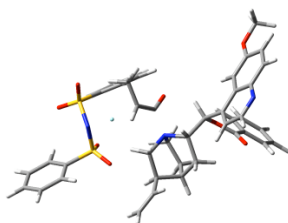

|   |             |             |             |   |             |             |             |
|---|-------------|-------------|-------------|---|-------------|-------------|-------------|
| C | -0.00554700 | 0.01938400  | -1.44760600 | C | 3.82064900  | 3.83174400  | 0.78768300  |
| C | 0.71262100  | -0.22704000 | -2.60275400 | C | 1.93045500  | 3.04044400  | -0.53987400 |
| N | -0.17261400 | -1.25513200 | -0.43524400 | C | 1.06826600  | 3.79415600  | 0.25604800  |
| C | -1.56490200 | -1.89489900 | -0.60637400 | C | 2.94743900  | 4.59424500  | 1.56193100  |
| C | 0.04651400  | -0.73811000 | 0.97528200  | H | 4.88652200  | 3.82282200  | 0.98129500  |
| C | 0.84002900  | -2.35747300 | -0.68920900 | H | 1.53707400  | 2.44023900  | -1.34772500 |
| H | 1.10360200  | -0.47087200 | 1.01480700  | H | 0.00270100  | 3.75872900  | 0.05240900  |
| H | -0.54643300 | 0.16712700  | 1.06852100  | H | 3.33954900  | 5.20027000  | 2.37373900  |
| H | 0.54784300  | -2.84118400 | -1.62422400 | H | 0.89916300  | 5.16440600  | 1.91118400  |
| H | 1.80635600  | -1.87676600 | -0.81846700 | C | 6.15315100  | -0.78233300 | 0.45679200  |
| H | -1.55016300 | -2.20485600 | -1.65439900 | C | 8.75606000  | -1.69626400 | 0.25298300  |
| H | 1.08785800  | -1.21284700 | -2.82972200 | C | 6.38693600  | -2.04877400 | -0.08522400 |
| N | 4.20404500  | 0.43910700  | -0.98527500 | C | 7.19414100  | 0.03684600  | 0.89744500  |
| F | 2.61407800  | 0.16661400  | -1.40429000 | C | 8.50320500  | -0.43253700 | 0.79202500  |
| C | -0.31943900 | -1.82510500 | 2.00669100  | C | 7.70118800  | -2.50260800 | -0.18394300 |
| H | -1.25796700 | -1.57778400 | 2.51088000  | H | 5.55377100  | -2.66211600 | -0.40994700 |
| H | 0.46114800  | -1.87074200 | 2.77340200  | H | 6.97819600  | 1.01787000  | 1.30281900  |
| C | -1.64508400 | -3.13648300 | 0.33138300  | H | 9.32545000  | 0.19159400  | 1.12930400  |
| H | -1.67314300 | -4.04914600 | -0.27435500 | H | 7.90126100  | -3.48570800 | -0.60019800 |
| H | -2.57772200 | -3.11050000 | 0.89635700  | H | 9.77863200  | -2.05452400 | 0.17232900  |
| C | 0.86851100  | -3.37888200 | 0.47725600  | O | 5.80323900  | 2.39913100  | -0.82594200 |
| H | 1.71725000  | -3.12830200 | 1.12272100  | O | 4.40047800  | 0.81895100  | 1.65278000  |
| C | -0.43653900 | -3.17835700 | 1.28607400  | O | -0.55899100 | 1.03961700  | -1.02675400 |
| H | -0.56492400 | -3.99041900 | 2.00884300  | C | 0.82634500  | 0.82086600  | -3.67126600 |
| S | 4.46558300  | -0.20830700 | 0.60984200  | H | 1.86987400  | 1.13076800  | -3.80949800 |
| O | 3.58711800  | -1.38321900 | 0.69072000  | H | 0.46486500  | 0.43880900  | -4.63607700 |
| S | 4.43390500  | 2.13747100  | -1.28403100 | H | 0.23673100  | 1.70549000  | -3.41499600 |
| O | 4.05546700  | 2.30818600  | -2.68300300 | C | 1.07135500  | -4.78037100 | -0.03481600 |
| C | 3.29766900  | 3.06586500  | -0.25672100 | H | 0.29403100  | -5.17914600 | -0.68955600 |
| C | 1.57492100  | 4.57252800  | 1.29922400  | C | 2.12594500  | -5.54380800 | 0.25535800  |

|   |             |             |             |   |             |             |             |
|---|-------------|-------------|-------------|---|-------------|-------------|-------------|
| H | 2.22529300  | -6.55337500 | -0.13411000 | O | -5.72383500 | 3.21341400  | -0.94859400 |
| H | 2.93037700  | -5.18508600 | 0.89404300  | C | -6.69649300 | 4.20233700  | -1.24831600 |
| C | -2.73426100 | -0.88614000 | -0.51439500 | H | -6.33204500 | 5.12445000  | -0.79202200 |
| H | -2.38499900 | 0.03526800  | -0.98024000 | H | -6.80154900 | 4.35320800  | -2.33066200 |
| C | -3.99649100 | -1.30576200 | -1.25833300 | H | -7.67613900 | 3.95166300  | -0.82062000 |
| C | -4.99736600 | -0.31147500 | -1.53160400 | C | -4.13522900 | -0.15219700 | 2.88734500  |
| C | -4.20200000 | -2.57148200 | -1.76073000 | C | -5.01450500 | -0.65440300 | 3.85844600  |
| C | -4.91207600 | 1.03363100  | -1.10307500 | C | -3.50702200 | 1.08615400  | 3.08928400  |
| C | -6.14053300 | -0.72082000 | -2.29794100 | C | -5.26167700 | 0.07245000  | 5.01990600  |
| C | -5.36923900 | -2.86401800 | -2.50820200 | H | -5.49331000 | -1.61167700 | 3.68123100  |
| H | -3.49406000 | -3.37326700 | -1.58409700 | C | -3.75760200 | 1.80960100  | 4.25434700  |
| C | -5.91035700 | 1.94457600  | -1.41085700 | H | -2.83355300 | 1.47736200  | 2.33534500  |
| H | -4.07135400 | 1.38731900  | -0.51825900 | C | -4.63270800 | 1.30495900  | 5.21947100  |
| C | -7.14456600 | 0.23467800  | -2.59150400 | H | -5.94355400 | -0.31940000 | 5.76935000  |
| H | -5.51633400 | -3.87276000 | -2.89285700 | H | -3.27126200 | 2.76874600  | 4.40821500  |
| C | -7.04316400 | 1.53905000  | -2.16300300 | H | -4.82558900 | 1.87232800  | 6.12610200  |
| H | -7.99792300 | -0.10163700 | -3.17168700 | C | -3.91348400 | -0.97925900 | 1.66661000  |
| H | -7.82798300 | 2.24635700  | -2.40548500 | O | -2.97820100 | -0.42488500 | 0.85023000  |
| N | -6.31211000 | -1.98794500 | -2.77462700 | O | -4.48177600 | -2.03001500 | 1.44593100  |

### Structure: TS-B

\*\*\*\*\*

Gaussian 09: IA32W-G09RevA.02 8-May-2009  
21-Jan-2011

\*\*\*\*\*

%nosave

%mem=10000MB

%nprocshared=4

Will use up to 4 processors via shared memory.

-----  
# opt=(calcfc,ts,noeigen) freq=noraman ub3lyp/genecp ginput  
-----

-----  
- Thermochemistry -  
-----

Zero-point correction= 0.811550 (Hartree/Particle)  
Thermal correction to Energy= 0.871522  
Thermal correction to Enthalpy= 0.872466  
Thermal correction to Gibbs Free Energy= 0.708845  
Sum of electronic and zero-point Energies= -4677.236551  
Sum of electronic and thermal Energies= -4677.176579  
Sum of electronic and thermal Enthalpies= -4677.175635  
Sum of electronic and thermal Free Energies= -4677.339256

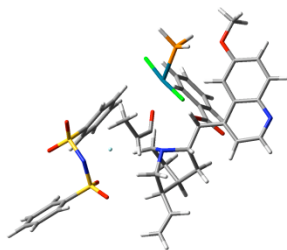

|   |             |            |             |   |             |             |             |
|---|-------------|------------|-------------|---|-------------|-------------|-------------|
| C | -0.34528500 | 0.15119700 | -1.34972100 | H | -0.15151100 | 0.20237700  | 1.19543500  |
| C | -1.15667700 | 0.02296700 | -2.46542900 | H | -1.14081300 | 2.85993400  | -1.90548200 |
| N | -0.44019200 | 1.45347400 | -0.48965200 | H | -2.40582300 | 1.81335000  | -1.22465500 |
| C | 0.87193700  | 2.30201200 | -0.49629000 | H | 0.96135200  | 2.58112900  | -1.54956500 |
| C | -0.83536200 | 0.99943000 | 0.92415300  | H | -1.63158100 | 0.89348800  | -2.89135600 |
| C | -1.52776400 | 2.40573300 | -0.99017600 | N | -4.55435500 | -0.70398500 | -0.91633600 |
| H | -1.83394100 | 0.57939900 | 0.80311400  | F | -2.88114500 | -0.35848000 | -1.32326500 |

|    |              |             |             |   |             |             |             |
|----|--------------|-------------|-------------|---|-------------|-------------|-------------|
| C  | -0.80903000  | 2.18483300  | 1.90378000  | C | -1.15580100 | -1.21817000 | -3.30185300 |
| H  | 0.04637700   | 2.10926800  | 2.58178200  | H | -2.16280800 | -1.39282900 | -3.69193800 |
| H  | -1.71700100  | 2.15469600  | 2.51487000  | H | -0.46229600 | -1.11543500 | -4.14579000 |
| C  | 0.61672500   | 3.56434300  | 0.38740500  | H | -0.85751700 | -2.09462900 | -2.72112000 |
| H  | 0.64822600   | 4.45693100  | -0.24582100 | C | -2.16203500 | 4.80318900  | -0.58395100 |
| H  | 1.42406700   | 3.65955100  | 1.11538600  | H | -1.30283200 | 5.33828400  | -0.99281200 |
| C  | -1.88399800  | 3.47535400  | 0.07277000  | C | -3.37902200 | 5.33426300  | -0.70812600 |
| H  | -2.80240900  | 3.15095800  | 0.57272400  | H | -3.53482500 | 6.29297300  | -1.19554700 |
| C  | -0.73897100  | 3.49467700  | 1.10753600  | H | -4.26346800 | 4.81986200  | -0.34003800 |
| H  | -0.84126700  | 4.35539400  | 1.77619700  | C | 2.17478000  | 1.52495700  | -0.19991700 |
| S  | -5.07421500  | 0.71069500  | -0.08169500 | H | 2.17477300  | 0.65527000  | -0.85328500 |
| O  | -4.67597500  | 1.81816500  | -0.96158000 | C | 3.46069900  | 2.28184800  | -0.53198600 |
| S  | -4.52233900  | -2.25830200 | -0.15175400 | C | 4.71652600  | 1.57879200  | -0.48761900 |
| O  | -4.04020200  | -3.15209200 | -1.19891600 | C | 3.48591400  | 3.58594100  | -0.97432700 |
| C  | -3.32932500  | -2.26251800 | 1.18286900  | C | 4.85530900  | 0.21562200  | -0.13024200 |
| C  | -1.50829000  | -2.38159000 | 3.26513200  | C | 5.89691300  | 2.31461600  | -0.84347300 |
| C  | -3.76938300  | -2.01614200 | 2.48660000  | C | 4.71160400  | 4.20799800  | -1.31809100 |
| C  | -1.99834600  | -2.57981200 | 0.90405000  | H | 2.58357900  | 4.17687500  | -1.05946300 |
| C  | -1.08553200  | -2.63805000 | 1.95848600  | C | 6.09930100  | -0.39519200 | -0.11802400 |
| C  | -2.84639200  | -2.07465500 | 3.52932900  | H | 3.99656200  | -0.38543200 | 0.14255900  |
| H  | -4.81236000  | -1.79263500 | 2.67265800  | C | 7.15478400  | 1.66460400  | -0.79572300 |
| H  | -1.68254400  | -2.78766800 | -0.11077200 | H | 4.70448600  | 5.24409700  | -1.65512600 |
| H  | -0.05232200  | -2.88901800 | 1.74213900  | C | 7.26737100  | 0.33976400  | -0.44058200 |
| H  | -3.17425000  | -1.88653200 | 4.54783800  | H | 8.02749600  | 2.25207100  | -1.06214100 |
| H  | -0.79192200  | -2.42572700 | 4.08139200  | H | 8.24313900  | -0.13191800 | -0.42148400 |
| C  | -6.85411300  | 0.55820800  | -0.15949700 | N | 5.88217300  | 3.61831800  | -1.24731500 |
| C  | -9.61101400  | 0.39192700  | -0.28550300 | O | 6.11379500  | -1.72716400 | 0.20245200  |
| C  | -7.49062500  | 0.77461700  | -1.38475000 | C | 7.36361000  | -2.35184500 | 0.46359900  |
| C  | -7.56719100  | 0.26158300  | 1.00210000  | H | 7.12555700  | -3.36214600 | 0.80095800  |
| C  | -8.95768300  | 0.18345300  | 0.93142400  | H | 7.98798500  | -2.41054100 | -0.43789900 |
| C  | -8.88017600  | 0.68705700  | -1.44022300 | H | 7.91651600  | -1.82709400 | 1.25263000  |
| H  | -6.90695600  | 1.00976400  | -2.26794000 | C | 2.84177600  | 0.50852100  | 3.33667700  |
| H  | -7.03829900  | 0.10009600  | 1.93396100  | C | 3.23735200  | 1.00128300  | 4.58951100  |
| H  | -9.52946100  | -0.04442400 | 1.82618400  | C | 2.59053000  | -0.86308200 | 3.17010200  |
| H  | -9.39229200  | 0.85021000  | -2.38395000 | C | 3.37480500  | 0.13306900  | 5.66918800  |
| H  | -10.69424400 | 0.32419300  | -0.33525400 | H | 3.43344700  | 2.06340700  | 4.69366100  |
| O  | -5.86174600  | -2.40685600 | 0.43178200  | C | 2.73589700  | -1.72768100 | 4.25497800  |
| O  | -4.64615200  | 0.73619700  | 1.32663300  | H | 2.29532700  | -1.25223100 | 2.20148400  |
| O  | 0.41310300   | -0.71161300 | -0.82829300 | C | 3.12409000  | -1.23249200 | 5.50266900  |
| Pd | 1.99534900   | -1.84627600 | -1.75748000 | H | 3.67914800  | 0.51776700  | 6.63856500  |
| P  | 3.77521700   | -3.00249500 | -2.48091500 | H | 2.55285000  | -2.79004000 | 4.12066400  |
| H  | 4.85778900   | -2.99458300 | -1.58347500 | H | 3.23533700  | -1.91061100 | 6.34477300  |
| H  | 4.37340700   | -2.58037800 | -3.68219700 | C | 2.71627700  | 1.48655400  | 2.21988600  |
| H  | 3.59130100   | -4.37757800 | -2.71138700 | O | 3.03034500  | 2.65839300  | 2.29429300  |
| Cl | 2.30701400   | -0.23836600 | -3.47008400 | O | 2.17700900  | 0.90562600  | 1.11526500  |
| Cl | 1.90857100   | -3.51332400 | -0.05982800 |   |             |             |             |

Structure: TS-C

\*\*\*\*\*

Gaussian 09: IA32W-G09RevA.02 8-May-2009  
21-Jan-2011

\*\*\*\*\*

%nosave

%mem=10000MB

%nprocshared=4

Will use up to 4 processors via shared memory.

-----  
# opt=(calcfc,ts,noeigen) freq=norman ub3lyp/genecp ginput  
-----

-----  
- Thermochemistry -  
-----

Zero-point correction= 0.809936 (Hartree/Particle)  
 Thermal correction to Energy= 0.870672  
 Thermal correction to Enthalpy= 0.871616  
 Thermal correction to Gibbs Free Energy= 0.704317  
 Sum of electronic and zero-point Energies= -4677.223914  
 Sum of electronic and thermal Energies= -4677.163179  
 Sum of electronic and thermal Enthalpies= -4677.162235  
 Sum of electronic and thermal Free Energies= -4677.329534

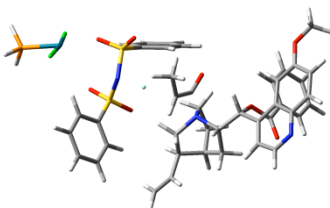

|   |             |             |             |    |             |             |             |
|---|-------------|-------------|-------------|----|-------------|-------------|-------------|
| C | -1.34510900 | 0.46261800  | 1.03252100  | H  | 5.08480200  | 2.15200400  | 1.12000500  |
| C | -0.69063800 | 1.30742500  | 1.90296400  | H  | 5.54447800  | 4.52860800  | 1.65851200  |
| N | -1.76370200 | 1.15373900  | -0.42342100 | H  | 2.53716900  | 5.77155600  | -1.16733500 |
| C | -3.17530500 | 1.75188900  | -0.33615600 | H  | 4.27500100  | 6.33880300  | 0.52035100  |
| C | -1.66542300 | 0.07084300  | -1.47730200 | O  | 4.44952100  | -1.72933000 | 1.07822500  |
| C | -0.83446300 | 2.27660200  | -0.83264100 | O  | 4.50456500  | 0.30503700  | -1.19254300 |
| H | -0.60012000 | -0.15610700 | -1.55502100 | O  | -1.70255300 | -0.71325900 | 1.11022700  |
| H | -2.16949700 | -0.80339400 | -1.07697300 | Pd | 6.55281900  | -1.17440000 | 0.56486100  |
| H | -1.04245400 | 3.12020000  | -0.17117100 | P  | 8.68254900  | -0.86037400 | 0.04291900  |
| H | 0.17922300  | 1.92875600  | -0.65001700 | H  | 9.52019600  | -1.98072200 | 0.18100400  |
| H | -3.06444700 | 2.50258300  | 0.45003500  | H  | 9.38024600  | 0.12119600  | 0.76931000  |
| H | -0.53660000 | 2.34822500  | 1.65702300  | H  | 8.93753700  | -0.48302000 | -1.28712700 |
| N | 2.90767800  | 0.31794400  | 0.80980000  | Cl | 6.71465000  | 0.45888700  | 2.26297200  |
| F | 1.32376300  | 0.68875400  | 1.05609800  | Cl | 6.66100600  | -2.83377900 | -1.13828200 |
| C | -2.25962300 | 0.56497300  | -2.81172800 | C  | -0.38296200 | 0.85993600  | 3.30362300  |
| H | -3.22352200 | 0.08575200  | -3.00619300 | H  | 0.60385700  | 1.21817300  | 3.61358000  |
| H | -1.58850200 | 0.28937100  | -3.63235800 | H  | -1.12102400 | 1.24355700  | 4.02395500  |
| C | -3.50085400 | 2.43324500  | -1.69917800 | H  | -0.38107000 | -0.23033600 | 3.37046500  |
| H | -3.55679400 | 3.51873600  | -1.56036000 | C  | -0.94061000 | 4.16774300  | -2.50843000 |
| H | -4.48394200 | 2.11414400  | -2.04765800 | H  | -1.59966000 | 4.78971200  | -1.89987600 |
| C | -1.05528200 | 2.67815200  | -2.31666900 | C  | -0.10965600 | 4.75914900  | -3.36980600 |
| H | -0.27703100 | 2.19980300  | -2.92333900 | H  | -0.08218700 | 5.83914800  | -3.48654500 |
| C | -2.42403300 | 2.09133500  | -2.74606400 | H  | 0.56689300  | 4.18410900  | -3.99908400 |
| H | -2.71638300 | 2.49215000  | -3.72165400 | C  | -4.22486400 | 0.76075000  | 0.21977100  |
| S | 3.25382400  | 0.94602000  | -0.77259800 | H  | -3.71537700 | 0.15749100  | 0.97168200  |
| O | 2.07892600  | 0.88409900  | -1.65290500 | C  | -5.41399600 | 1.41395600  | 0.91339900  |
| S | 3.01676200  | -1.37910100 | 1.17552400  | C  | -6.24258000 | 0.60666800  | 1.76543200  |
| O | 2.33838500  | -1.51939800 | 2.45353200  | C  | -5.70187600 | 2.75822600  | 0.83062000  |
| C | 2.15746900  | -2.31870500 | -0.07577300 | C  | -6.05590300 | -0.78091200 | 1.96540500  |
| C | 0.82282500  | -3.82423000 | -1.96464700 | C  | -7.31401300 | 1.26614600  | 2.45779900  |
| C | 2.88614100  | -2.86293500 | -1.13719600 | C  | -6.78554000 | 3.30375900  | 1.56180400  |
| C | 0.78025800  | -2.50745600 | 0.06857500  | H  | -5.12661000 | 3.42365100  | 0.19663800  |
| C | 0.11726800  | -3.27048800 | -0.89263200 | C  | -6.88922600 | -1.49822800 | 2.80958500  |
| C | 2.19953800  | -3.62087200 | -2.08624800 | H  | -5.26395500 | -1.32329600 | 1.46277900  |
| H | 3.95871200  | -2.71664300 | -1.21098100 | C  | -8.14796300 | 0.50314300  | 3.31215000  |
| H | 0.23479600  | -2.07339600 | 0.89864800  | H  | -7.00099800 | 4.36863500  | 1.48018800  |
| H | -0.95175900 | -3.43390900 | -0.79240500 | C  | -7.95059600 | -0.84743200 | 3.49068800  |
| H | 2.74864800  | -4.05865800 | -2.91448100 | H  | -8.94944500 | 1.02655200  | 3.82358100  |
| H | 0.29854500  | -4.42256800 | -2.70528300 | H  | -8.60562000 | -1.40304000 | 4.15179900  |
| C | 3.54651100  | 2.65136900  | -0.32267700 | N  | -7.57128400 | 2.60144500  | 2.34731500  |
| C | 4.07058900  | 5.29901500  | 0.27969400  | O  | -6.61899700 | -2.82839300 | 2.92593500  |
| C | 2.82539300  | 3.65044100  | -0.97743000 | C  | -7.42023200 | -3.61893700 | 3.79104100  |
| C | 4.53382100  | 2.94491700  | 0.62208900  | H  | -7.01357900 | -4.62984700 | 3.72940600  |
| C | 4.78640300  | 4.28328100  | 0.92065900  | H  | -7.36127500 | -3.26958200 | 4.82999500  |
| C | 3.09423200  | 4.98428100  | -0.66773100 | H  | -8.47060500 | -3.63260300 | 3.47172500  |
| H | 2.07313700  | 3.39071000  | -1.71242300 | C  | -5.99426800 | -1.45520500 | -2.23643200 |

|   |             |             |             |   |             |             |             |
|---|-------------|-------------|-------------|---|-------------|-------------|-------------|
| C | -7.02035800 | -1.45487900 | -3.19343100 | H | -8.14307200 | -2.62486700 | -4.60661500 |
| C | -5.30303600 | -2.64346400 | -1.95558100 | H | -5.10317500 | -4.73676000 | -2.40907000 |
| C | -7.34843400 | -2.62897900 | -3.86591400 | H | -6.91312600 | -4.72742500 | -4.11034300 |
| H | -7.54674500 | -0.52720200 | -3.39190900 | O | -4.60132700 | -0.27050300 | -0.74464700 |
| C | -5.63647200 | -3.81666800 | -2.63080400 | C | -5.68968000 | -0.16520300 | -1.55463800 |
| H | -4.51749900 | -2.64438200 | -1.20855000 | O | -6.31991300 | 0.85894700  | -1.72589800 |
| C | -6.65615100 | -3.81087800 | -3.58604200 |   |             |             |             |

### Structure: TS-D

\*\*\*\*\*

Gaussian 09: IA32W-G09RevA.02 8-May-2009  
21-Jan-2011

\*\*\*\*\*

%nosave

%mem=10000MB

%nprocshared=4

Will use up to 4 processors via shared memory.

-----  
# opt=(calcfc,ts,noeigen) freq=noraman ub3lyp/genecp gfinput  
-----

- Thermochemistry -  
-----

Zero-point correction= 0.813283 (Hartree/Particle)  
Thermal correction to Energy= 0.874512  
Thermal correction to Enthalpy= 0.875456  
Thermal correction to Gibbs Free Energy= 0.710329  
Sum of electronic and zero-point Energies= -4684.653697  
Sum of electronic and thermal Energies= -4684.592468  
Sum of electronic and thermal Enthalpies= -4684.591524  
Sum of electronic and thermal Free Energies= -4684.756651

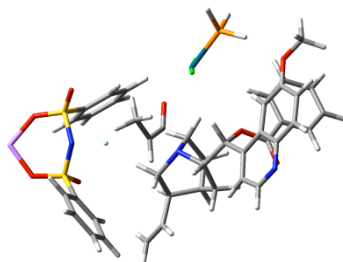

|   |             |             |             |   |             |             |             |
|---|-------------|-------------|-------------|---|-------------|-------------|-------------|
| C | -0.63741100 | 0.00387900  | -0.48788100 | H | 0.24111700  | 3.61740300  | 2.08765900  |
| C | -1.24706200 | 0.76911300  | -1.45195600 | H | 1.68956200  | 2.73248400  | 2.51289800  |
| N | -0.41243700 | 0.72057700  | 0.92906500  | C | -1.64121900 | 1.78532300  | 2.89102700  |
| C | 0.60844400  | 1.87633900  | 0.82806100  | H | -2.12511000 | 1.03210400  | 3.52447500  |
| C | 0.01512900  | -0.31617400 | 1.96063700  | C | -0.13908900 | 1.82813000  | 3.26486800  |
| C | -1.72806100 | 1.31991600  | 1.41242600  | H | -0.00947900 | 2.30165100  | 4.24251800  |
| H | -0.82881700 | -1.00102200 | 2.04787800  | S | -5.85612000 | 0.52829900  | -0.08574700 |
| H | 0.84658700  | -0.87846000 | 1.55064300  | O | -5.45424600 | 0.37153500  | 1.30830500  |
| H | -1.95722800 | 2.15665100  | 0.75169900  | S | -4.89808100 | -2.18426300 | -1.11819100 |
| H | -2.49344500 | 0.56018600  | 1.26209300  | O | -4.13863200 | -2.57028700 | -2.28970500 |
| H | 0.16788600  | 2.51950600  | 0.06585100  | C | -4.11904400 | -2.75095200 | 0.36619000  |
| H | -1.47757100 | 1.80621700  | -1.23666300 | C | -2.89237100 | -3.76729700 | 2.61492200  |
| N | -4.93108700 | -0.42344100 | -1.20277900 | C | -4.89172400 | -2.96440400 | 1.51543500  |
| F | -3.40394800 | 0.01012700  | -0.93918400 | C | -2.74841600 | -3.02649400 | 0.31642600  |
| C | 0.35950800  | 0.37593600  | 3.29557300  | C | -2.13721600 | -3.54165400 | 1.46098400  |
| H | 1.43786700  | 0.34496100  | 3.46902500  | C | -4.26162200 | -3.47832100 | 2.64493000  |
| H | -0.11342000 | -0.17068000 | 4.11848800  | H | -5.95441100 | -2.75373100 | 1.52290000  |
| C | 0.65222100  | 2.60846600  | 2.20029800  | H | -2.17002000 | -2.84698500 | -0.58170200 |

|    |             |             |             |    |             |             |             |
|----|-------------|-------------|-------------|----|-------------|-------------|-------------|
| H  | -1.07340800 | -3.76035900 | 1.43297500  | C  | 2.76990000  | 2.55096600  | -0.41471200 |
| H  | -4.84155400 | -3.66359500 | 3.54368000  | C  | 3.94580300  | 2.22227300  | -1.17297900 |
| H  | -2.41209200 | -4.17911500 | 3.49793500  | C  | 2.37884800  | 3.87166600  | -0.38447900 |
| C  | -5.51064700 | 2.16323400  | -0.67629800 | C  | 4.46482200  | 0.91394500  | -1.30884700 |
| C  | -5.07698700 | 4.75154600  | -1.52506800 | C  | 4.62611000  | 3.30328000  | -1.82928100 |
| C  | -5.02573300 | 3.09725100  | 0.24246300  | C  | 3.12614200  | 4.85694600  | -1.07611700 |
| C  | -5.78665600 | 2.48955600  | -2.00908500 | H  | 1.51265900  | 4.19964400  | 0.17951500  |
| C  | -5.55891900 | 3.79788300  | -2.42828000 | C  | 5.60436900  | 0.67380300  | -2.05826500 |
| C  | -4.81311900 | 4.40417800  | -0.19811800 | H  | 3.98360500  | 0.07070200  | -0.83109400 |
| H  | -4.82236900 | 2.81228600  | 1.26911000  | C  | 5.79122700  | 3.02224300  | -2.58475200 |
| H  | -6.15752300 | 1.74196800  | -2.70151000 | H  | 2.80345300  | 5.89663800  | -1.03618600 |
| H  | -5.76013400 | 4.07367100  | -3.45854700 | C  | 6.27956100  | 1.74093400  | -2.70259900 |
| H  | -4.44579300 | 5.14991500  | 0.50001200  | H  | 6.28463400  | 3.85821600  | -3.06950500 |
| H  | -4.90871700 | 5.77083100  | -1.85959300 | H  | 7.17198500  | 1.55989300  | -3.28983100 |
| O  | -6.35119000 | -2.52832500 | -1.03963500 | N  | 4.20840600  | 4.60039100  | -1.77404600 |
| O  | -7.26896200 | 0.18364800  | -0.44711100 | O  | 6.01778800  | -0.62966300 | -2.12730200 |
| O  | -0.27624400 | -1.19998900 | -0.50554900 | C  | 7.21811900  | -0.92874100 | -2.83336400 |
| Pd | 1.53883300  | -2.23135500 | -1.15877000 | H  | 7.36742200  | -2.00456800 | -2.72599300 |
| P  | 3.39035400  | -3.26867400 | -1.88864900 | H  | 7.13190200  | -0.68036400 | -3.89824300 |
| H  | 4.50474000  | -2.42598500 | -2.05084200 | H  | 8.07795900  | -0.40255600 | -2.40187100 |
| H  | 3.28002600  | -3.88225200 | -3.14814500 | C  | 4.50170100  | 0.09779600  | 2.66528900  |
| H  | 3.88673200  | -4.31298600 | -1.08769600 | C  | 5.53334200  | 0.52851900  | 3.51574300  |
| Cl | 1.78114700  | -0.98663200 | -3.15369800 | C  | 4.26672700  | -1.27560100 | 2.48978300  |
| Cl | 1.53061100  | -3.54002200 | 0.82431400  | C  | 6.32544300  | -0.40402500 | 4.17881300  |
| C  | -1.42813800 | 0.31340400  | -2.86954500 | H  | 5.69870900  | 1.59354700  | 3.63933600  |
| H  | -2.40576200 | 0.63210700  | -3.24554200 | C  | 5.05983200  | -2.20352500 | 3.16371600  |
| H  | -0.65694300 | 0.74420200  | -3.51787000 | H  | 3.46989200  | -1.62175700 | 1.84135200  |
| H  | -1.35349600 | -0.77190600 | -2.95162800 | C  | 6.08861700  | -1.77123200 | 4.00448500  |
| C  | -2.36646300 | 3.09007500  | 3.09776200  | H  | 7.12537500  | -0.06782200 | 4.83202700  |
| H  | -1.98195400 | 3.95166600  | 2.54916400  | H  | 4.86935400  | -3.26474400 | 3.03204800  |
| C  | -3.41219000 | 3.25349500  | 3.91187500  | H  | 6.70525000  | -2.49852700 | 4.52559700  |
| H  | -3.88040000 | 4.22380000  | 4.05294700  | Li | -7.84086000 | -1.45812600 | -1.06474100 |
| H  | -3.82760900 | 2.42647900  | 4.48385400  | O  | 2.73024400  | 0.61601500  | 1.17748500  |
| C  | 1.96845100  | 1.42701700  | 0.24089800  | C  | 3.69185000  | 1.14916800  | 1.99744200  |
| H  | 1.75718600  | 0.70603900  | -0.55612300 | O  | 3.83481200  | 2.34194200  | 2.17091700  |

### Structure: BQ

\*\*\*\*\*

Gaussian 09: IA32W-G09RevA.02 8-May-2009  
21-Jan-2011

\*\*\*\*\*

%nosave

%mem=10000MB

%nprocshared=4

Will use up to 4 processors via shared memory.

# opt=(calcf,ts,noeigen) freq=noraman ub3lyp/genecp ginput

-----  
- Thermochemistry -  
-----

Zero-point correction= 0.502429 (Hartree/Particle)

Thermal correction to Energy= 0.528881

Thermal correction to Enthalpy= 0.529825

Thermal correction to Gibbs Free Energy= 0.443068

Sum of electronic and zero-point Energies= -1380.340698

Sum of electronic and thermal Energies= -1380.314247

Sum of electronic and thermal Enthalpies= -1380.313303

Sum of electronic and thermal Free Energies= -1380.400060

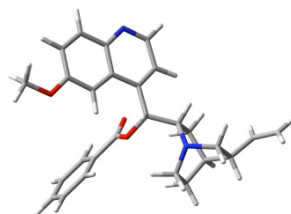

|   |             |             |             |   |             |             |             |
|---|-------------|-------------|-------------|---|-------------|-------------|-------------|
| N | -2.60352300 | -0.33510600 | 1.64834800  | C | 2.42308200  | -2.78567200 | -0.94525500 |
| C | -2.00607400 | -0.76313900 | 0.35788600  | C | 0.55327400  | -3.29926200 | -2.15807900 |
| C | -2.61874700 | 1.13433800  | 1.79918500  | H | -1.27206900 | -2.23917500 | -1.72041500 |
| C | -3.99074500 | -0.82081300 | 1.68988000  | C | 3.78315600  | -1.35994200 | 1.07014200  |
| H | -3.11525400 | 1.34852100  | 2.75245400  | H | 1.96634100  | -0.33355800 | 1.43352100  |
| H | -1.59124300 | 1.49067600  | 1.88458600  | C | 3.79476300  | -3.02396300 | -0.68148700 |
| H | -3.98056100 | -1.90984000 | 1.57533400  | H | 0.08950300  | -3.88933700 | -2.94807800 |
| H | -4.39417600 | -0.60010200 | 2.68455200  | C | 4.46970300  | -2.33429300 | 0.30076700  |
| H | -2.16529600 | -1.84729000 | 0.33828900  | H | 4.29455800  | -3.77532200 | -1.28464500 |
| C | -3.35956100 | 1.82452800  | 0.61397200  | H | 5.51888900  | -2.54116900 | 0.47808400  |
| H | -2.66967700 | 2.44941800  | 0.03385600  | N | 1.82911700  | -3.52148200 | -1.92942500 |
| H | -4.15926800 | 2.48227200  | 0.97723200  | O | 4.36859000  | -0.62887900 | 2.06361000  |
| C | -2.77036200 | -0.11858200 | -0.84300300 | C | 5.73886100  | -0.84833000 | 2.35685300  |
| H | -3.14517800 | -0.90126500 | -1.51357100 | H | 5.98089100  | -0.16557700 | 3.17356400  |
| H | -2.11821500 | 0.51310300  | -1.44904800 | H | 5.92462500  | -1.88007500 | 2.68356700  |
| C | -4.88592400 | -0.16415900 | 0.56850400  | H | 6.38105900  | -0.62096000 | 1.49570200  |
| H | -5.60715500 | 0.50493100  | 1.05857400  | C | 0.94053900  | 2.67339100  | -0.71836900 |
| C | -3.94312700 | 0.71879500  | -0.28608000 | C | 1.25288400  | 3.39740900  | -1.87816900 |
| H | -4.50355200 | 1.16342600  | -1.11746700 | C | 1.20860800  | 3.22939400  | 0.54102100  |
| C | -5.67593100 | -1.16427700 | -0.25094400 | C | 1.82407400  | 4.66364300  | -1.78053500 |
| H | -5.48017800 | -1.17876800 | -1.32440500 | H | 1.04111000  | 2.94791400  | -2.84258400 |
| C | -6.58645200 | -2.01026700 | 0.23646600  | C | 1.78115700  | 4.49736300  | 0.63441000  |
| H | -7.12281200 | -2.70311500 | -0.40640800 | H | 0.97343000  | 2.66725200  | 1.43754000  |
| H | -6.83791300 | -2.04272200 | 1.29534400  | C | 2.08838700  | 5.21568200  | -0.52380400 |
| C | -0.46688200 | -0.62530700 | 0.40842900  | H | 2.06412600  | 5.22046900  | -2.68206100 |
| H | -0.21787900 | -0.84132800 | 1.45193400  | H | 1.98933100  | 4.92441100  | 1.61155000  |
| C | 0.33527800  | -1.59406500 | -0.45011500 | H | 2.53445600  | 6.20382300  | -0.44728900 |
| C | 1.72861200  | -1.79934600 | -0.16691400 | C | 0.32946700  | 1.32197600  | -0.89588400 |
| C | -0.22930700 | -2.35584800 | -1.44844000 | O | 0.13731100  | 0.80713600  | -1.97915900 |
| C | 2.44267000  | -1.10075300 | 0.83507500  | O | 0.00341600  | 0.75905500  | 0.29364200  |
